# Supplementary material
Source: publisher site journal article supplement (https://www.dovepress.com/article/453473)
Supplement: Supplementary file 1 [file get_supplementary_file.php]

## Table S1. Univariable and Multivariable logistic regression for the Vitamin D deficiency(defined as 25(OH)D < 20ng/ml) among all hospital staff

|  |  |  | Univariable analysis | | | Multivariable analysis | | |
| --- | --- | --- | --- | --- | --- | --- | --- | --- |
|  |  | number (%) | OR (95%CI) | P-value | OR (95%CI) | | P-value |
| Sex | female | 1945 (77.52%) | 0.62 (0.33, 1.15) | 0.131 | 0.48 (0.23, 0.98) | | 0.044 |
| Age | >30 | 1899 (75.69%) | 0.35 (0.17, 0.73) | 0.005 | 0.42 (0.20, 0.89) | | 0.024 |
| Job category | AS | 312 (12.44%) | 1.0 |  |  | |  |
|  | LP | 608 (24.23%) | 0.55 (0.26, 1.18) | 0.124 | 0.40 (0.18, 0.88) | | 0.023 |
|  | MS | 253 (10.08%) | 0.72 (0.29, 1.80) | 0.486 | 0.67 (0.26, 1.70) | | 0.402 |
|  | Nurse | 1336 (53.25%) | 1.39 (0.65, 2.97) | 0.399 | 1.04 (0.46, 2.36) | | 0.927 |
| TSH (μIU/mL) | within normal range(0.56-5.91) | 2338 (93.18%) | 1.0 |  |  | |  |
|  | subpar to normal range(≤0.56) | 63 (2.51%) | 0.46 (0.16, 1.31) | 0.146 |  | |  |
|  | superior to normal range(≥5.91) | 108 (4.30%) | 1.10 (0.34, 3.54) | 0.878 |  | |  |
| FT3 (pg/mL) | within normal range(2.30-4.80) | 2471 (98.49%) | 1.0 |  |  | |  |
|  | superior to normal range(≥4.80) | 38 (1.51%) | 1.19 (0.16, 8.79) | 0.865 |  | |  |
| FT4 (ng/dL) | within normal range(0.59-1.25) | 2473 (98.57%) | 1.0 |  |  | |  |
|  | subpar to normal range(≤0.59) | 22 (0.88%) | 0.31 (0.07, 1.36) | 0.122 |  | |  |
|  | superior to normal range(≥1.25) | 14 (0.56%) | 0.41 (0.05, 3.15) | 0.389 |  | |  |
| BMI (kg/m2) | 18-24 | 1520 (60.58%) | 1.0 |  |  | |  |
|  | <18 | 86 (3.43%) | 1.31 (0.31, 5.49) | 0.711 | 1.04 (0.24, 4.48) | | 0.956 |
|  | >24 | 903 (35.99%) | 0.91 (0.57, 1.45) | 0.686 | 0.89 (0.53, 1.49) | | 0.647 |
| Hypertension |  | 704 (28.06%) | 0.87 (0.54, 1.42) | 0.588 |  | |  |
| LDL-C (mmol/L) | within normal range(<3.37) | 1921 (76.56%) | 1.0 |  |  | |  |
|  | superior to normal range (≥3.37) | 588 (23.44%) | 0.77 (0.47, 1.28) | 0.314 | 1.65 (0.68, 3.98) | | 0.267 |
| HDL-C (mmol/L) | within normal range(1.03-1.55) | 1667 (66.44%) | 1.0 |  |  | |  |
|  | subpar to normal range(≤1.03) | 219 (8.73%) | 1.21 (0.48, 3.09) | 0.683 |  | |  |
|  | superior to normal range(≥1.55) | 623 (24.83%) | 0.63 (0.39, 1.02) | 0.058 |  | |  |
| UA (μmol/L) | within normal range(208-428) | 2243 (89.40%) | 1.0 |  |  | |  |
|  | subpar to normal range(≤208) | 36 (1.43%) | 1.13 (0.15, 8.35) | 0.907 | 1.10 (0.14, 8.44) | | 0.928 |
|  | superior to normal range(≥428) | 230 (9.17%) | 1.03 (0.47, 2.26) | 0.949 | 0.95 (0.40, 2.22) | | 0.902 |
| CHO (mmol/L) | within normal range(3.25-5.2) | 1895 (75.53%) | 1.0 |  |  | |  |
|  | subpar to normal range(≤3.25) | 78 (3.11%) | 1.05 (0.25, 4.40) | 0.946 | 0.99 (0.23, 4.20) | | 0.990 |
|  | superior to normal range(≥5.2) | 536 (21.36%) | 0.57 (0.35, 0.92) | 0.022 | 0.41 (0.18, 0.94) | | 0.035 |
| TG (mmol/L) | within normal range (≤1.7) | 2113 (84.22%) | 1.0 |  |  | |  |
|  | superior to normal range(＞1.7) | 396 (15.78%) | 0.78 (0.44, 1.39) | 0.397 |  | |  |
| Glc (mmol/L) | within normal range(3.9-6-1) | 2418 (96.37%) | 1.0 |  |  | |  |
|  | subpar to normal range(≤3.9) | 32 (1.28%) | 0.47 (0.11, 1.99) | 0.303 |  | |  |
|  | superior to normal range(≥6.1) | 59 (2.35%) | 0.58 (0.18, 1.90) | 0.369 |  | |  |
| Surgery |  | 915 (36.47%) | 2.95 (1.62, 5.38) | 0.000 | 2.68 (1.42, 5.05) | | 0.002 |
| Radiation exposure |  | 213 (8.49%) | 1.12 (0.48, 2.60) | 0.798 | 1.55 (0.64, 3.76) | | 0.330 |

AS: Administrative staff ; LP: Licensed physicians; MS: Medical scientists; TSH: thyroid stimulating hormone; FT3: free thyroxine 3; FT4: free thyroxine4;
LDL-C: low-density lipoprotein cholesterol, HDL-C: high-density lipoprotein cholesterol; UA, uric acid; CHO: cholesterol; TG: triacylglycerol; Glc: glucose
BMI: body mass index
